# Supplementary material
Source: PubMed Central journal article supplement (PMC6984001)
Supplement: NIHMS1064662-supplement-Supplemental.pdf [file NIHMS1064662-supplement-Supplemental.pdf]

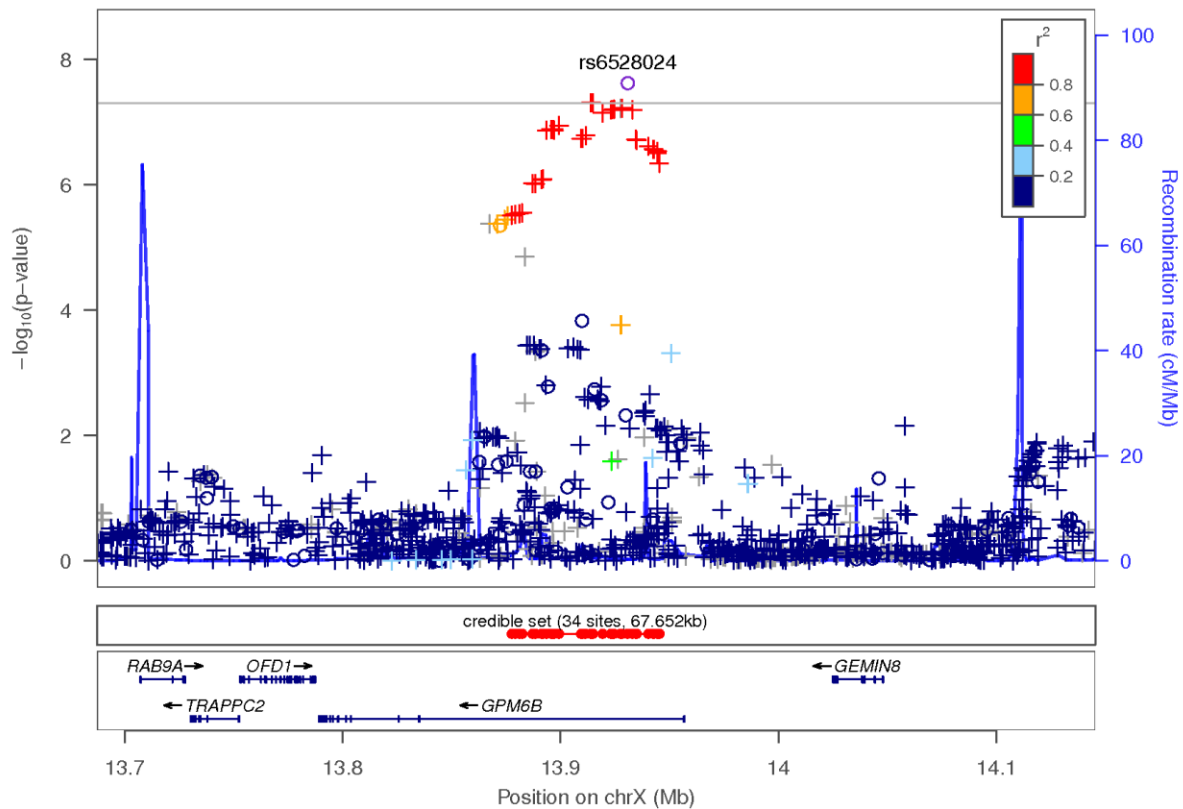

**Supplementary Figure 1** Regional association plot focusing on top SNP rs6528025 at 3' of *GPM6B* gene on chromosome X at position 13.9 Mb. This plot was generated using LocusZoom<sup>1</sup>. The  $-\log_{10}(P\text{ value})$  is shown on the left y-axis; position in Mb is on the x-axis. Recombination rates (expressed in centiMorgans cM per Mb; NCBI Build GRCh37; highlighted in blue) are shown on the right y-axis. Pairwise linkage disequilibrium ( $r^2$ ) of each SNP with the top SNP in the region is indicated by its color. Crossed points represent imputed SNPs, circles represent directly genotyped SNPs. The statistical tests used were two-sided; sample size = 23,217.

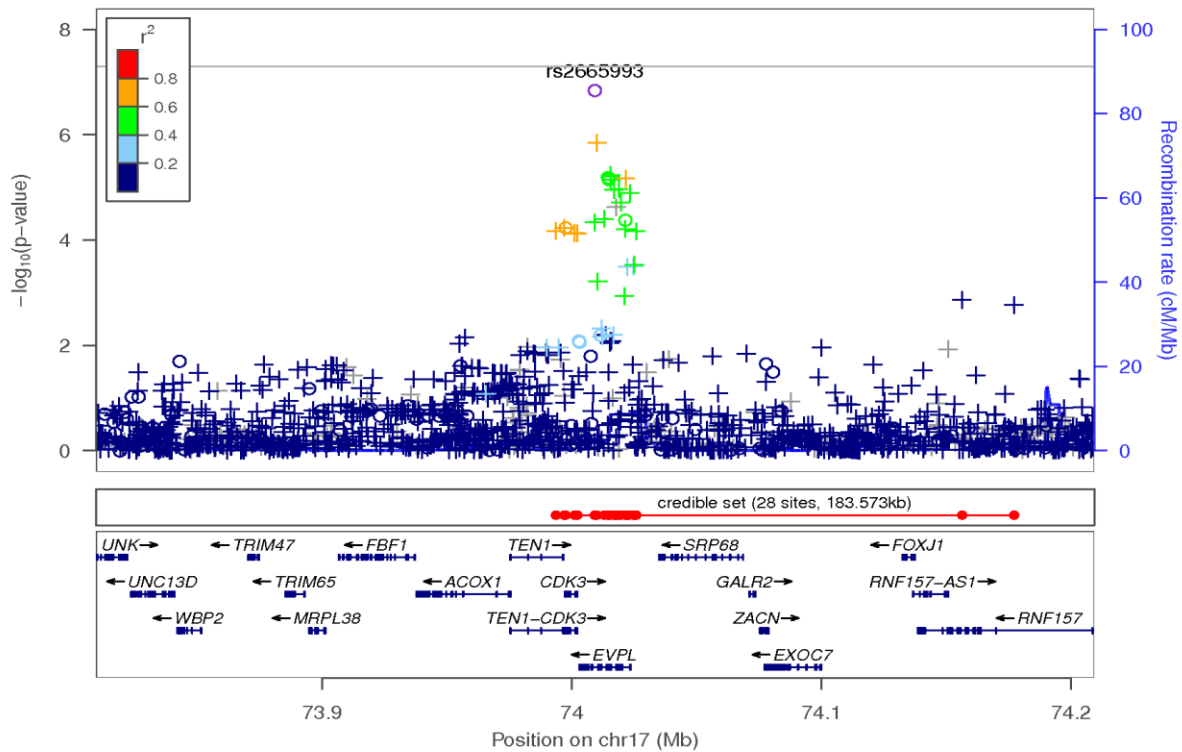

**Supplementary Figure 2** Regional association plot showing the second index SNP rs2665993, located in the *EVPL* gene on chromosome 17. This plot was generated using LocusZoom<sup>1</sup>. The  $-\log_{10}(P \text{ value})$  is shown on the left y-axis; position in Mb is on the x-axis. Recombination rates (expressed in centiMorgans cM per Mb; NCBI Build GRCh37; highlighted in blue) are shown on the right y-axis. Pairwise linkage disequilibrium ( $r^2$ ) of each SNP with the top SNP in the region is indicated by its color. Crossed points represent imputed SNPs, circles represent directly genotyped SNPs. The statistical tests used were two-sided; sample size = 23,217.

**Supplementary Table 1**

This table shows the number of SNPs after applying various quality control filters for genotyped and imputed dosage data, and association test results data, as described in the Online Methods.

|                                    | Genotyped | Imputed Dosage | Association Results |
|------------------------------------|-----------|----------------|---------------------|
| no filters                         | 1,050,074 | 15,574,220     | -                   |
| Hardy-Weinberg Equilibrium > 1e-20 | 954,373   | -              | -                   |
| genotype call rate > 90%           | 934,855   | -              | -                   |
| imputation quality                 | -         | 13,230,301     | -                   |
| Minor Allele Frequency < 0.1% *    | -         | -              | 11,508,756          |

\* = poor residual behavior

## Supplementary Table 2

This table shows demographic characteristics of the 23andMe cohort.

|                                                                  | 23andMe cohort * | Sample Size ** |
|------------------------------------------------------------------|------------------|----------------|
| <b>Demographics</b>                                              |                  |                |
| Age in years (mean, SD)                                          | 53.79 (16.08)    | 23,677         |
| Age in years (range)                                             | 18-101           | 23,677         |
| Female                                                           | 55.30%           | 23,677         |
| BMI (mean, S.D)                                                  | 27.00 (5.79)     | 22,889         |
| Years of education (mean, SD)                                    | 16.75 (2.62)     | 20,460         |
| Household income (mean, SD)                                      | 6.07 (1.98)      | 17,919         |
| Marital status (married vs. unmarried)                           | 49.3%            | 21,862         |
| <b>Drug use</b> <sup>1</sup>                                     |                  |                |
| Drug exposure lifetime use                                       | 2.95 (2.04)      | 23,111         |
| <b>Alcohol use</b>                                               |                  |                |
| Alcohol lifetime use ( <i>N</i> , never/ever)                    | 1,376 / 23,108   | 24,484         |
| Days of alcohol use (past 30 days)                               | 8.78 (9.82)      | 21,727         |
| Days of alcohol use (heaviest, lifetime, 30-day period)          | 13.78 (10.96)    | 21,229         |
| <b>Smoking</b> <sup>1</sup>                                      |                  |                |
| Smoking lifetime use ( <i>N</i> , never/ever)                    | 10,770 / 13,695  | 24,465         |
| Number of cigarettes per day (past 30 days)                      | 1.45 (5.69)      | 12,773         |
| Number of cigarettes per day (heaviest, lifetime, 30-day period) | 12.85 (14.93)    | 12,598         |
| Days of tobacco use (past 30 days)                               | 3.12 (8.65)      | 12,716         |
| Days of tobacco use (heaviest, lifetime, 30-day period)          | 17.20 (13.23)    | 12,380         |
| <b>Cannabis Use</b> <sup>1</sup>                                 |                  |                |
| Cannabis lifetime use ( <i>N</i> , never/ever)                   | 10,514 / 13,864  | 24,378         |
| Days of cannabis use (past 30 days)                              | 1.75 (6.04)      | 13,067         |
| Days of cannabis use (heaviest, lifetime, 30-day period)         | 7.08 (9.99)      | 12,805         |
| <b>Caffeine</b> <sup>1</sup>                                     |                  |                |
| Caffeine use (cups of coffee per day)                            | 1.90 (2.12)      | 22,865         |
| <b>AUDIT</b> <sup>2</sup>                                        |                  |                |
| AUDIT total score (sample range 0-40)                            | 3.84 (3.47)      | 20,754         |

\* = European Ancestry only; \*\* = Prior to GWAS analysis (see Supplementary Table 3 for exclusion criteria; Final sample size = 23,127); *BMI* = Body Mass Index; *Household income* = 9 categories { $\leq$ \$10K, \$10K-\$25K, \$25K-\$35K, \$35K-\$50K, \$50K-\$75K, \$75K-\$100K, \$100K-\$150K, \$150K-\$300K,  $\geq$ \$300K}; *Drug Use* = Lifetime drug use, one point was given for each drug the subject endorsed having tried {Alcohol, Marijuana, Cocaine, Methamphetamines, LSD/Magic Mushrooms, Ecstasy, Prescription Stimulants (taken not as prescribed), Prescription Painkillers (taken not as prescribed), Heroin, Opium}; *AUDIT* = Alcohol Use Disorder Identification Test. Substance use was very low in this population, suggesting that DD was unlikely to be altered by substance use<sup>3</sup>.

## References

<sup>1</sup> <https://www.phenxtoolkit.org>

<sup>2</sup> Saunders, J.B., et al. *Addict. Abingdon Engl.* **88**, 791–804 (1993).

<sup>3</sup> Mackillop, J., et al. *Psychopharmacol.* **216**, 305-321 (2011).

### Supplementary Table 3

Monetary Choice Questionnaire items.

---

| Items | Would you rather have: |                  |
|-------|------------------------|------------------|
| 1     | \$54 Today             | \$55 in 117 Days |
| 2     | \$55 Today             | \$75 in 61 Days  |
| 3     | \$19 Today             | \$25 in 53 Days  |
| 4     | \$31 Today             | \$85 in 7 Days   |
| 5     | \$14 Today             | \$25 in 19 Days  |
| 6     | \$47 Today             | \$50 in 160 Days |
| 7     | \$15 Today             | \$35 in 13 Days  |
| 8*    | \$55 Today             | \$85 Today       |
| 9     | \$25 Today             | \$60 in 14 Days  |
| 10    | \$78 Today             | \$80 in 162 Days |
| 11    | \$40 Today             | \$55 in 62 Days  |
| 12    | \$11 Today             | \$30 in 7 Days   |
| 13    | \$67 Today             | \$75 in 119 Days |
| 14    | \$34 Today             | \$35 in 186 Days |
| 15    | \$27 Today             | \$50 in 21 Days  |
| 16    | \$69 Today             | \$85 in 91 Days  |
| 17*   | \$60 Today             | \$20 Today       |
| 18    | \$49 Today             | \$60 in 89 Days  |
| 19    | \$80 Today             | \$85 in 157 Days |
| 20    | \$24 Today             | \$35 in 29 Days  |
| 21    | \$33 Today             | \$80 in 14 Days  |
| 22    | \$28 Today             | \$30 in 179 Days |
| 23    | \$34 Today             | \$50 in 30 Days  |
| 24*   | \$15 Today             | \$35 Today       |
| 25    | \$25 Today             | \$30 in 80 Days  |
| 26    | \$41 Today             | \$75 in 20 Days  |
| 27    | \$54 Today             | \$60 in 111 Days |
| 28    | \$54 Today             | \$80 in 30 Days  |
| 29    | \$22 Today             | \$25 in 136 Days |
| 30    | \$20 Today             | \$55 in 7 Days   |

---

\* These items are not part of the original questionnaire. We added them to identify individuals who responded carelessly. Participants choosing one or more lower monetary rewards for items 8, 17 or 24 were excluded from all analysis (because they were assumed to be responding carelessly). In addition, we excluded participants showing <80% of consistent preferences (i.e., the proportion of choices with which the  $k$  value is consistent). We excluded 550 subjects using these two criteria.

### References

Kirby, K.N., Petry, N.M. & Bickel, W.K. *J. Exp. Psychol. Gen.* **128**, 78–87 (1999).

**Supplementary Table 4**

Distribution (%) of DD scores expressed as  $\log_{10}(k)$  from the Monetary Choice Questionnaire.

| $\log_{10}(k)$ | Sample size | Sex    |        | Age    |        |        |        |
|----------------|-------------|--------|--------|--------|--------|--------|--------|
|                |             | Male   | Female | 18-30  | 30-45  | 45-60  | >60    |
| -3.8,-2.67     | 6908        | 52.53% | 47.47% | 9.70%  | 23.60% | 25.70% | 41.10% |
| -2.67,-2.15    | 5607        | 44.75% | 55.26% | 9.30%  | 21.60% | 25.90% | 43.20% |
| -2.15,-1.73    | 5208        | 40.28% | 59.72% | 10.00% | 22.40% | 28.10% | 39.50% |
| -1.73,-0.61    | 5404        | 39.80% | 60.20% | 10.20% | 22.60% | 27.30% | 40.00% |

Higher scores (more positive values) indicate higher rates of DD; meaning less value is placed on delayed rewards. Each row corresponds to a particular range.

**Supplementary Table 5**

Phenotypic correlations between DD and demographic, and drug (alcohol, tobacco, cannabis; current/heaviest use) and caffeine use traits.

| Phenotype                                                         | Pearson <i>r</i> | t      | <i>P</i> value | N**    |
|-------------------------------------------------------------------|------------------|--------|----------------|--------|
| <b>Demographics</b>                                               |                  |        |                |        |
| Age in years                                                      | < 0.001          | -0.02  | 0.99           | 23,664 |
| Sex (male = 0, female = 1)*                                       | 0.11             | 16.56  | < 0.0001       | 23,677 |
| BMI *                                                             | 0.11             | 17.14  | < 0.0001       | 22,889 |
| Household income *                                                | -0.10            | -13.48 | < 0.0001       | 17,919 |
| Marital status (0 = unmarried, 1 = married)                       | -0.01            | -1.99  | 0.05           | 21,862 |
| Years of education *                                              | -0.17            | -24.64 | < 0.0001       | 20,460 |
| <b>Drug exposure lifetime *</b>                                   | 0.05             | 8.29   | < 0.0001       | 23,111 |
| <b>AUDIT</b> total score                                          | < 0.001          | 0.47   | 0.64           | 20,754 |
| <b>Alcohol use</b>                                                |                  |        |                |        |
| Days of alcohol use (past 30 days) *                              | -0.05            | -7.33  | < 0.0001       | 21,727 |
| Days of alcohol use (heaviest, lifetime, 30-days period) *        | -0.07            | -9.85  | < 0.0001       | 21,229 |
| <b>Smoking</b>                                                    |                  |        |                |        |
| Number of cigarettes per day (lifetime, 30-days period) *         | 0.08             | 9.15   | < 0.0001       | 12,773 |
| Number of cigarettes per day (heaviest, lifetime, 30-days period) | 0.04             | 4.18   | < 0.0001       | 12,598 |
| Days of tobacco use (past 30 days) *                              | 0.09             | 10.19  | < 0.0001       | 12,716 |
| Days of tobacco use (heaviest, lifetime, 30-days period)          | 0.01             | 1.52   | 0.13           | 12,380 |
| <b>Cannabis use</b>                                               |                  |        |                |        |
| Days of cannabis use (past 30 days) *                             | 0.05             | 6.16   | < 0.0001       | 13,067 |
| Days of cannabis use (heaviest, lifetime, 30-days period)         | 0.02             | 1.95   | 0.05           | 12,805 |
| <b>Caffeine use</b> (cups of coffee per day)                      | 0.01             | 1.81   | 0.07           | 22,865 |

All correlations are calculated using data from the 23andMe cohort. Pairwise phenotypic correlations (*r*); the statistical tests used were two-sided. *AUDIT* = Alcohol Use Disorder Identification Test; \* = *P* < 0.001; \*\* = prior to GWAS analysis (see Supplementary Table 3 for exclusion criteria; Final sample size *n* = 23,127)

**Supplementary Table 6**

Null GWAS model with covariates

| Covariates               | Estimate | SE   | t     | Pr(> t )               | Variance explained |
|--------------------------|----------|------|-------|------------------------|--------------------|
| Sex                      | 0.15     | 0.01 | 16.00 | $2.10 \times 10^{-57}$ | 1.148 %            |
| Age (inverse normalized) | 0.01     | 0.01 | 1.20  | $0.21 \times 10^{-1}$  | 0.000 %            |
| PC 0                     | 0.00     | 0.01 | 0.60  | $5.30 \times 10^{-1}$  | 0.002 %            |
| PC 1                     | 0.00     | 0.01 | 0.10  | $9.40 \times 10^{-1}$  | 0.001 %            |
| PC 2                     | 0.04     | 0.01 | 7.30  | $3.60 \times 10^{-13}$ | 0.228 %            |
| PC 3                     | -0.02    | 0.01 | -3.20 | $1.20 \times 10^{-3}$  | 0.066 %            |
| PC 4                     | 0.02     | 0.01 | 4.80  | $1.40 \times 10^{-6}$  | 0.118 %            |
| Platform v2              | -0.02    | 0.03 | -0.90 | $3.70 \times 10^{-1}$  | 0.071 %            |
| Platform v3.1            | 0.06     | 0.02 | 3.50  | $4.00 \times 10^{-4}$  | 0.020 %            |
| Platform v4              | 0.09     | 0.02 | 6.50  | $9.00 \times 10^{-11}$ | 0.184 %            |

Results of fitting a model for delay discounting based on covariates. Principal components (PC) computed from all SNP data from 23andMe research participants with European ancestry (n=23,127). Effect sizes are in units of standard deviations.



**Supplementary Table 7**Strongest associations ( $P < 10^{-7}$ ) with DD in the 23andMe cohort

| SNP id      | chr | cytoband | bp        | alleles | EAF   | <i>P</i> value        | $\beta$ | SE    | 95% CI        | $R^2$  | <i>P</i> value batch effect | localization |
|-------------|-----|----------|-----------|---------|-------|-----------------------|---------|-------|---------------|--------|-----------------------------|--------------|
| rs6528024   | X   | Xp22.2   | 13930922  | C/T     | 0.025 | $2.40 \times 10^{-8}$ | -0.10   | 0.017 | [-0.14,-0.07] | 0.9990 | 0.0030                      | intron       |
| rs2665993   | 17  | 17q25.1  | 74009211  | A/G     | 0.376 | $1.40 \times 10^{-7}$ | -0.04   | 0.007 | [-0.05,-0.02] | 0.9990 | 0.34                        | intron       |
| rs146042968 | 18  | 18q12.1  | 25527620  | G/T     | 0.987 | $3.00 \times 10^{-7}$ | -0.17   | 0.031 | [-0.23,-0.10] | 0.8967 | 0.79                        | intron       |
| rs192923788 | 2   | 2q11.2   | 102156781 | A/G     | 0.003 | $3.90 \times 10^{-7}$ | -0.39   | 0.077 | [-0.55,-0.24] | 0.6966 | 0.57                        | intergenic   |
| rs455636    | 21  | 21q21.3  | 31351431  | A/C     | 0.947 | $6.00 \times 10^{-7}$ | 0.08    | 0.015 | [0.05,0.11]   | 0.9912 | 0.29                        | intergenic   |
| rs187716580 | 18  | 18q12.3  | 40690093  | C/T     | 0.003 | $8.00 \times 10^{-7}$ | -0.40   | 0.081 | [-0.56,-0.24] | 0.5603 | 0.21                        | intron       |

*SNP id* = marker name; *chr* = chromosome; *bp* = position (HG37); *alleles* = Other Allele/Effect Allele; *EAF* = effect allele frequency;  $\beta$  = beta effect size; *CI* = confidence interval;  $R^2$  = average score across imputation batches. The statistical tests used were two-sided; sample size = 23,217.

**Supplementary Table 8**

Associations (P &lt; 0.05) between previous candidate genes and DD

| Chr | SNP id     | Gene    | Reference | EA                          | EAF     | p     | β     | se    | N              | 23andMe        |      |      |        |      |       |
|-----|------------|---------|-----------|-----------------------------|---------|-------|-------|-------|----------------|----------------|------|------|--------|------|-------|
|     |            |         |           |                             |         |       |       |       |                | EA             | EAF  | p    | β      | se   | N     |
| 3   | rs3773678  | DRD3    |           | T                           | 0.17    | 0.03  | -0.19 |       |                | G              | 0.87 | 0.20 | -0.01  | 0.01 |       |
|     | rs7638876  |         |           | G                           | 0.35    | 0.04  | -0.14 |       |                | T              | 0.67 | 0.41 | -0.01  | 0.01 |       |
| 5   | rs464049   | SLC6A3  | 1         | G                           | 0.45    | 0.02  | -0.17 | NR    | 175 HA         | G              | 0.44 | 0.01 | 0.02   | 0.01 |       |
|     | rs3756450  |         |           | G                           | 0.12    | 0.01  | -0.29 |       |                | G              | 0.12 | 0.25 | 0.01   | 0.01 |       |
|     | rs12652860 |         |           | A                           | 0.27    | 0.01  | 0.01  |       | 174 HA         | C              | 0.72 | 0.79 | <0.01  | 0.01 |       |
|     |            | DAT     | 2         | ADHD x DAT <sub>110/6</sub> | NR      | <0.05 | 0.16* | 0.00  | 36 ADHD, 32 HV |                |      | NR   |        |      |       |
| 6   | rs1360780  | FKBP5   | 3         | T                           | 0.27    | 0.05  | -0.67 | 0.29  | 84 HA          | T              | 0.30 | 0.13 | -0.01  | 0.01 |       |
| 7   | rs10249982 | DDC     | 1         | G                           | 0.22    | 0.07  | -0.02 |       |                | G              | 0.24 | 0.70 | <-0.01 | 0.01 | 23127 |
|     | rs10244632 |         |           | T                           | 0.25    | 0.01  | -0.20 |       |                | T              | 0.25 | 0.91 | <0.01  | 0.01 |       |
|     | rs1466163  |         |           | A                           | 0.11    | 0.05  | -0.23 |       | 175 HA         | G              | 0.88 | 0.81 | 0.00   | 0.01 |       |
|     | rs10499696 |         |           | C                           | 0.11    | 0.01  | -0.28 | NR    |                | C              | 0.10 | 0.97 | <0.01  | 0.01 |       |
| 10  | rs363338   | SLC18A2 |           | G                           | 0.30    | 0.01  | -0.21 |       |                | G              | 0.27 | 0.76 | <0.01  | 0.01 |       |
|     | rs1800544  | ADRA2A  | 4         | cocaine x G                 | 0.30    | <0.01 | 0.22* |       | 215            | T              | 0.69 | 0.76 | <0.01  | 0.01 |       |
| 11  | rs1800497  | ANKK1   | 5         | G                           | 0.22    | 0.01  | 0.02  |       | 713 DS         | G              | 0.85 | 0.85 | <0.01  | 0.01 |       |
|     | rs6277     | DRD2    | 6         | G                           | 0.05    | 0.04  | 1.41  | 0.577 | 90 HA          | G              | 0.45 | 0.86 | <0.01  | 0.01 |       |
|     | VNTR       | DRD4    | 1         | 7R+                         | 0.14    | 0.05  | -0.29 | NR    | 175            |                |      | NR   |        |      |       |
| 22  | rs4680     | COMT    | 7         | G                           | 0.48    | 0.01  | 0.08* |       | 10 HA, 9 AA    | G              | 0.48 | 0.93 | <-0.01 | 0.01 |       |
|     |            |         |           | 2                           | G       | 0.48  | <0.05 | 0.10* | 0.00           | 36 ADHD, 32 HV |      |      |        |      |       |
|     |            |         |           | 8                           | age x G | 0.48  | 0.01  | 0.07* |                | 70 HA, 72 LA   |      |      |        |      |       |
|     |            |         |           | 9                           | G       | 0.54  | <0.01 | 0.30  | NR             | 73 HA          |      |      |        |      |       |
|     |            |         |           | 5                           | G       | 0.48  | 0.01  | 0.02  |                | 713 DS         |      |      |        |      |       |

chr = chromosome; SNP id = marker name; EA = Effect Allele; EAF = effect allele frequency; β = beta effect size; \* = eta squared or cohen's estimate of effect size; NR = not reported; HA = healthy adults; DS = daily smokers; AA = abstinent alcoholics; LA = late adolescents. Some of the reasons for discrepancies between candidate gene studies and our GWAS findings include small sample size of the candidate gene study, multiple testing within and between studies, publication bias, and an expectation that true allelic effect sizes are similar to those reported in GWAS<sup>10</sup>.

**References**

- Gray, J.C. & MacKillop, J. *Brain Behav.* **4**, 812–821 (2014).
- Paloyelis, Y., et al. *Neuropsychopharmacol. Off. Publ. Am. Coll. Neuropsychopharmacol.* **35**, 2414–2426 (2010).
- Kawamura, Y. et al. *Asia-Pac. Psychiatry Off. J. Pac. Rim Coll. Psychiatr.* **5**, 31–38 (2013).
- Havranek, M.M. et al. *Addict. Biol.* **22**, 561–569 (2017).
- MacKillop, J. et al. *Psychopharmacology (Berl.)* **232**, 3731–3739 (2015).
- Kawamura, Y. et al. *Open J. Psychiatry* **03**, 26–31 (2013)
- Boettiger, C.A. et al. *J. Neurosci. Off. J. Soc. Neurosci.* **27**, 14383–14391 (2007).
- Smith, C.T. & Boettiger, C.A. *Psychopharmacology (Berl.)* **222**, 609–617 (2012).
- Gianotti, L.R.R., Figner, B., Ebstein, R.P. & Knoch, D. *Front. Neurosci.* **6**, 54 (2012).
- Hart, A.B., de Wit, H. & Palmer, A.A. *Neuropsychopharmacol.* **38**, 802–816 (2013).

## Supplementary Table 9

Top 10 entries for the gene-based association analysis using transcriptome data (S-PrediXcan)

| gene name      | Z score | effect size | P value  | FDR < 0.05 | gene expression variance | $r^2$ predicted performance | P predicted performance | Q predicted performance | SNPs used (N) | SNPs covariance (N) | SNPs model (N) | brain tissue              |
|----------------|---------|-------------|----------|------------|--------------------------|-----------------------------|-------------------------|-------------------------|---------------|---------------------|----------------|---------------------------|
| <i>CDK3</i>    | 5.18    | 0.09        | 2.19E-07 | Yes        | 0.09                     | 0.18                        | 7.62E-05                | 5.40E-04                | 11            | 12                  | 12             | hippocampus               |
| <i>STRN4</i>   | -4.51   | -0.08       | 6.45E-06 | No         | 0.08                     | 0.08                        | 8.63E-03                | 2.05E-02                | 12            | 12                  | 12             | hypothalamus              |
| <i>TEN1</i>    | 4.41    | 0.04        | 1.03E-05 | No         | 0.37                     | 0.50                        | 7.02E-17                | 1.90E-15                | 22            | 23                  | 23             | cerebellum                |
| <i>PPP1R1C</i> | -4.36   | -0.06       | 1.33E-05 | No         | 0.13                     | 0.07                        | 2.10E-02                | 3.40E-02                | 40            | 40                  | 40             | hippocampus               |
| <i>TEN1</i>    | 4.32    | 0.09        | 1.54E-05 | No         | 0.06                     | 0.14                        | 2.80E-04                | 9.15E-04                | 11            | 11                  | 11             | frontal cortex            |
| <i>CDK3</i>    | 4.26    | 0.05        | 2.03E-05 | No         | 0.20                     | 0.35                        | 4.12E-08                | 1.04E-06                | 9             | 9                   | 9              | anterior cingulate cortex |
| <i>CDK3</i>    | 4.16    | 0.07        | 3.18E-05 | No         | 0.09                     | 0.24                        | 4.45E-06                | 5.41E-05                | 6             | 6                   | 6              | hypothalamus              |
| <i>TEN1</i>    | 4.05    | 0.05        | 5.12E-05 | No         | 0.20                     | 0.25                        | 2.03E-06                | 2.69E-05                | 16            | 16                  | 16             | hippocampus               |
| <i>CDK3</i>    | 4.03    | 0.05        | 5.69E-05 | No         | 0.14                     | 0.32                        | 6.17E-09                | 5.02E-08                | 4             | 4                   | 4              | cerebellar hemisphere     |
| <i>TEN1</i>    | 4.00    | 0.06        | 6.30E-05 | No         | 0.09                     | 0.15                        | 7.85E-05                | 2.89E-03                | 9             | 9                   | 9              | caudate basal ganglia     |

*Gene name* = as listed by the Transcriptome Model, generally extracted from Genquant (<http://www.gencodegenes.org/>); *Z score* = summary PrediXcan's association result for the gene; *effect size* = summary PrediXcan's association *effect size* for the gene; *P value* = P-value of the *effect size* statistic; *FDR* = False discovery rate < 5%; *gene expression variance* = variance of the gene expression, calculated as  $W' * G * W$  (where  $W$  is the vector of SNP weights in a gene's model,  $W'$  is its transpose, and  $G$  is the covariance matrix);  *$r^2$  predicted performance* = prediction performance of tissue model's correlation to gene's measured transcriptome; *P predicted performance* = P value of tissue model's correlation to gene's measured transcriptome (prediction performance); *Q predicted performance* = Q value of tissue model's correlation to gene's measured transcriptome (prediction performance); *SNPs used (N)* = number of SNPs from GWAS used in Summary PrediXcan analysis; *SNPs covariance (N)* = number of SNPs in the covariance matrix; *SNPs model (N)* = number of SNPs in the model; *Brain tissue* gene expression models for different 10 brain tissues (anterior cingulate cortex, caudate basal ganglia, cerebellar hemisphere, cerebellum, cortex, frontal cortex, hippocampus, hypothalamus, nucleus accumbens basal ganglia, and putamen basal ganglia). Sample size = 23,217.

**Supplementary Table 10**

Genetic correlations between DD and other relevant traits using LD Regression Score (LDSC)

| Phenotype                  | Sample Size | Reference                | Genetic correlation ( $r_g$ ) | Standard error | <i>P</i> value | FDR < 0.05 |
|----------------------------|-------------|--------------------------|-------------------------------|----------------|----------------|------------|
| Years of Education         | 293,723     | Okbay et al, 2016a       | -0.67                         | 0.09           | 7.97E-15       | Yes        |
| College attainment         | 95,427      | Rietveld et al, 2013     | -0.93                         | 0.15           | 3.01E-10       | Yes        |
| Years of Education         | 101,069     | Rietveld et al, 2013     | -0.89                         | 0.14           | 4.29E-10       | Yes        |
| Childhood IQ               | 12,441      | Benyamin et al, 2014     | -0.63                         | 0.17           | 1.63E-04       | Yes        |
| ADHD                       | 53,293      | Demontis et al, 2017     | 0.37                          | 0.11           | 7.76E-04       | Yes        |
| Schizophrenia PGC2         | 77,096      | Ripke et al, 2014        | -0.22                         | 0.07           | 1.16E-03       | Yes        |
| Major Depressive Disorder  | 18,759      | Ripke et al, 2013        | 0.47                          | 0.17           | 6.87E-03       | Yes        |
| Smoking lifetime           | 74,035      | Furberg et al, 2010      | 0.32                          | 0.12           | 7.98E-03       | Yes        |
| Former smoker              | 70,675      | Furberg et al, 2010      | -0.41                         | 0.16           | 8.89E-03       | Yes        |
| BMI                        | 339,224     | Locke et al, 2015        | 0.18                          | 0.07           | 8.93E-03       | Yes        |
| Obesity class 1            | 98,697      | Berndt et al, 2013       | 0.21                          | 0.08           | 1.85E-02       | Yes        |
| Neuroticism                | 170,911     | Okbay et al, 2016b       | 0.18                          | 0.08           | 2.25E-02       | Yes        |
| Depressive Symptoms        | 161,460     | Okbay et al, 2016b       | 0.24                          | 0.11           | 3.17E-02       | No         |
| Daily cigarettes           | 68,028      | Furberg et al, 2010      | 0.39                          | 0.18           | 3.33E-02       | No         |
| Neuroticism                | 106,716     | Smith et al, 2016        | 0.18                          | 0.09           | 3.98E-02       | No         |
| Smoking Age onset          | 47,961      | Furberg et al, 2010      | -0.42                         | 0.23           | 6.66E-02       | No         |
| Anorexia Nervosa           | 17,767      | Boraska et al, 2014      | -0.28                         | 0.16           | 8.30E-02       | No         |
| Neo-openness to experience | 17,375      | Moor et al, 2012         | -0.27                         | 0.19           | 1.73E-01       | No         |
| Height                     | 253,288     | Wood et al, 2014         | -0.08                         | 0.06           | 1.77E-01       | No         |
| Bipolar disorder           | 16,731      | Sklar et al, 2011        | -0.17                         | 0.13           | 2.19E-01       | No         |
| Subjective Wellbeing       | 298,420     | Okbay et al, 2016b       | 0.12                          | 0.11           | 3.00E-01       | No         |
| Extraversion               | 63,030      | van den Berg et al, 2016 | 0.16                          | 0.15           | 3.08E-01       | No         |
| Caudate                    | 13,171      | Hibar et al, 2015        | -0.14                         | 0.15           | 3.31E-01       | No         |
| Hippocampus                | 13,171      | Hibar et al, 2015        | 0.19                          | 0.21           | 3.41E-01       | No         |
| Childhood obesity          | 13,848      | Bradfield et al, 2012    | 0.09                          | 0.11           | 3.84E-01       | No         |
| Cannabis lifetime use      | 32,330      | Stringer et al, 2016     | -0.05                         | 0.15           | 7.49E-01       | No         |
| Intracranial Brain Volume  | 13,171      | Hibar et al, 2015        | -0.05                         | 0.18           | 8.00E-01       | No         |
| Nucleus Accumbens          | 13,171      | Hibar et al, 2015        | -0.03                         | 0.25           | 9.09E-01       | No         |

**References**LDSC: <https://github.com/bulik/ldsc>

- Berndt, S.I. et al. *Nat. Genet.* **45**, 501–512 (2013).  
 Boraska, V. et al. *Mol. Psychiatry* **19**, 1085–1094 (2014).  
 Bradfield, J.P. et al. *Nat. Genet.* **44**, 526–531 (2012).  
 Bulik-Sullivan, B. et al. *Nat. Genet.* **47**, 1236–1241 (2015).  
 de Moor, M.H.M. et al. *Mol. Psychiatry* **17**, 337–349 (2012).  
 Demontis, D. et al. (2017). doi: 10.1101/145581  
 Furberg, H. et al. *Nat. Genet.* **42**, 441–447 (2010).  
 Hibar, D.P. et al. *Nature* **520**, 224–229 (2015).  
 Locke, A.E. et al. *Nature* **518**, 197–206 (2015).  
 Okbay, A. et al. *Nature* **533**: 539–542 (2016a)  
 Okbay, A. et al. *Nat. Genet.* **48**, 624–633 (2016b).  
 Psychiatric GWAS Consortium Bipolar Disorder Working Group *Nat. Genet.* **43**, 977–983 (2011).  
 Rietveld, C.A. et al. *Science* **340**, 1467–1471 (2013).  
 Ripke, S. et al. *Nature* **511**, 421–427 (2014).  
 Ripke, S. et al. *Mol. Psychiatry* **18**, 497–511 (2013).  
 Smith, D.J. et al. *Mol. Psychiatry* **21**, 749–757 (2016).  
 Stringer, S. et al. *Transl. Psychiatry* **6**, e769 (2016).  
 van den Berg, S.M. et al. *Behav. Genet.* **46**, 170–182 (2016).  
 Wood, A.R. et al. *Nat. Genet.* **46**, 1173–1186 (2014).
