# Supplementary material
Source: PubMed Central journal article supplement (PMC6984001)
Supplement: NIHMS1064662-supplement-supplemental_readme_file.pdf [file NIHMS1064662-supplement-supplemental_readme_file.pdf]

MCQ.readme.pdf

## REFERENCE

Sanchez-Roige et al Nature Neuroscience 2017

## DESCRIPTION

Summary statistics for the top 10,000 SNPs of the Genome-Wide Association Study (GWAS) of delay discounting limited to 23andMe Inc. research participants of European ancestry. GWAS results are shown in Figure 1 (Sanchez-Roige et al 2017).

## DISCLAIMER

We have provided summary statistics for the top 10,000 SNPs. Full GWAS summary statistics for the 23andMe dataset will be made available through 23andMe to qualified researchers under an agreement with 23andMe that protects the privacy of the 23andMe participants. Interested investigators should email [dataset-request@23andme.com](mailto:dataset-request@23andme.com) for more information.

## DOWNLOAD FILE

The following file is available for download: 23andMe\_MCQ\_k.23127.top10000.txt

The file includes the following information:

|        |                                                                    |
|--------|--------------------------------------------------------------------|
| snpid  | the SNP ID                                                         |
| chr    | the chromosome number on which the SNP is located (build 37, hg19) |
| bp     | the base pair position of the SNP (build 37, hg19)                 |
| A2     | the alternate allele                                               |
| A1     | the effect allele                                                  |
| EAF    | the effect allele frequency                                        |
| pvalue | the association test P value                                       |
| beta   | the effect size                                                    |
| se     | the standard error of the effect size                              |
